# Supplementary material
Source: PubMed Central journal article supplement (PMC5793997)
Supplement: NIHMS74958-supplement-Supplementary_Protocol_4.pdf [file NIHMS74958-supplement-Supplementary_Protocol_4.pdf]

## qPCR based reporter assay on luciferase transcripts

This protocol describes a reporter assay that measures the abundance of firefly transcripts by qPCR as a readout for enhancer activity. Similar to a classical luciferase assay, which uses the enzymatic activity of the luciferase to produce chemiluminescence, this assay measures abundance of luciferase transcripts which will be normalized to constitutively expressed Renilla transcripts.

Required:

Square plates (Thermo Scientific, cat. no. 166508)  
1x Trypsin (Gibco, Life Technologies, Cat No. 25300 054)  
1xPBS (Autoclaved)  
DMEM (Gibco, Cat no. 52100-047)  
+ 10% heat-inactivated FBS (Sigma, Cat No. F7524)  
+ 2 mM L-glutamine (Sigma, Cat No. G7513)  
C16 PKR inhibitor (Sigma-Aldrich, Cat No. I9785-5MG)  
BX-795 TBK1/IKK inhibitor (Sigma-Aldrich, Cat No. SML0694-5MG)  
Electroporation device: MaxCyte STX  
Electroporation buffer (Cat No. EPB1)  
OC-100 100- $\mu$ L (Cat No. GOC1)  
RNeasy Mini Kit (Qiagen, Cat No. 74104)  
Qiashredder column (Qiagen, Cat No. 79654)  
 $\beta$ -Mercaptoethanol ((Sigma-Aldrich, Cat No. 63689)  
Turbo DNase (Ambion, Cat No. AM1907)  
Oligo dT<sub>20</sub> (50 $\mu$ M, Thermo Fisher, Cat No. 18418020)  
RNase Inhibitor Murine (NEB, Cat No. M0314S)  
GoTag Sybr Green Master Mix (2x) (Promega, Cat No. A6001)  
pRL Renilla Luciferase Control Reporter Vector (Promega, Cat No. E2261)

### 1. Transfection by electroporation with the MaxCyte STX transfection system

This protocol describes 1x electroporation (EPO) for adherent cells (HeLa S3 & HCT116)

Prepare  $5 \times 10^6$  cells per electroporation for the day of transfection in square plates. Scale up or down the cell number according to the number of EPOs you want to perform.

- Remove Medium completely
- Wash cells carefully with 8 ml 1xPBS, remove PBS completely
- Add 8 ml 1xTrypsin to the cells to cover the plate completely
- Incubate cells at 37°C until they completely detach
- Add 12 ml Medium to the cells, resuspend and collect them in a 15 ml or 50 ml Falcon tube depending on the number of EPOs
- Count cells and aliquot  $5 \times 10^6$  cells per EPO
- Spin cells down, 125 g; 5 min
- Wash pellet once in 5 ml Electroporation (EPO) buffer
- Remove buffer and add ~ 50% of the final volume of EPO buffer to the cells (you

- need to reach a final volume of 100  $\mu$ l at the end  $\rightarrow$  see below)
- Prepare a separate tube with a mix of the Renilla and pBluescript plasmids, 1:10 ratio to reach a total of 20  $\mu$ g  $\rightarrow$  Renilla 2  $\mu$ g : pbluescript 18  $\mu$ g
  - Resuspend the cells and add them to the plasmid DNA mix (be careful not to introduce air bubbles)
    - (Plasmid concentration should be  $> 1 \mu\text{g}/\mu\text{l}$  for all used plasmids)
    - For the control samples do not add DNA to the cells
  - Measure volume of cells after addition of the plasmid DNA, fill up with EPO buffer to a total of 100  $\mu$ l
  - Add 100  $\mu$ l of the cell suspension into 1x OC100 MaxCyte cuvette and use default settings for electroporation (e.g. HeLa or HCT 116) or Optimization protocols for cell lines if no pre-set protocol is available (test before, which optimization protocol fits best for your cell line).
  - Transfer the 100  $\mu$ l of cell suspension immediately to a 1x75 pre-warmed flask without adding medium (cells recover without the addition of any medium)
  - Incubate cells @ 37°C; 30min.
  - Add an appropriate amount of pre-warmed medium without antibiotics to the cells, resuspend and plate at  $1 \times 10^6$  cells per well in a pre-warmed 6-well plate. For cells that induce interferon signaling upon DNA transfection (e.g. HeLa-S3), add C16 and BX-795 to the medium to a final concentration of 1  $\mu$ M each inhibitor.

### Harvesting after electroporation

- Harvest the cells 6h after addition of media
- For each well, harvest the medium of the cells (20% of cells are still not fully attached to the plates) in a 15ml Falcon tube
- wash once with 1ml PBS, harvest PBS
- add 1ml of trypsin
- incubate at 37°C until the cells fully detach, then add 1 ml of pre-warmed medium
- Harvest cell suspension
- Spin the cells down at 125g; 5min, take of S/N
- Resuspend cells in 1ml PBS
- Spin down cells 125g/5min, take of S/N

## 2. RNA isolation with RNeasy Mini Kit (Qiagen, Cat No. 74104)

- Resuspend the cells in 350 $\mu$ l RLT + 1%  $\beta$ -Mercaptoethanol (Cat No. 63689)
- Transfer lysate to Qias shredder column (Cat No. 79654), spin for 2 min at max speed
- Discard column, mix flow through with 1 volume 70% ethanol, mix by pipetting
- Transfer max 700  $\mu$ l lysate to RNeasy mini column, spin for 30s at 10,000g
- Discard flow through
- Wash column with 700  $\mu$ l RW1 (30s, 10,000xg), discard flow through,
- Wash column with 500  $\mu$ l RPE (30s, 10,000xg), discard flow through,
- Wash column with 500  $\mu$ l RPE (2 min, 10,000xg),
- Place column into new collection tube, spin for 1 min at full speed
- Elute into new 1.5ml tube with 50  $\mu$ l RNase free H<sub>2</sub>O

### 3. Turbo DNase I treatment (Ambion, Cat No. AM1907)

Add the following to a RNase-free tube on ice:

2 µg RNA sample

2 µl 10X Turbo DNase Buffer

2 µl Turbo-DNase

fill up with H<sub>2</sub>O to 20 µl

- Incubate tube(s) for 30min at 37°.
- Inactivate the DNase I by the addition of 2 µl of inactivation solution to the reaction mixture (mix well before use). Incubate for 2min at RT, vortex occasionally
- Centrifuge at 10,000xg for 5min and transfer 10 µl of the RNA into a fresh tube for the following reverse transcriptase. The remaining 10 µl can be transfer into a separate tube and used as a negative –RT control.

### 4. Reverse Transcription (RT)

Add the following to the DNaseI treated RNA (prepare master mix, add 10µl):

1 µl of Oligo dT<sub>20</sub> (50µM, Thermo Fisher Cat No. 18418020)

1 µl dNTPs (10 mM each)

4 µl 5X First-Strand Buffer (in the Superscript kit)

1 µl 0.1 M DTT (in the Superscript kit)

1 µl RNase Inhibitor Murine (Cat No. M0314S)

1 µl SuperScript III RT (SuperScript® III Cat No. 18080044)

1 µl H<sub>2</sub>O

Mix by gently pipetting up and down.

RT program:

25°C for 5 min, 50°C for 50 min, 70°C for 15 min

Bring RT reaction volume to 100 µl (add 80µl H<sub>2</sub>O)

### 5. qPCR

Reaction Setup (prepare master mix)

10 µl GoTag SYBR Green Master Mix (2x) (Promega; Cat No. A6001)

1 µl primer mix (10µM each)

2 µl cDNA

7 µl H<sub>2</sub>O

Distribute 18 µl MM into wells; add 2µl cDNA, seal, vortex and spin down.

Pipette each sample per primer pair in triplicate.

Program: 95°C for 2 min; (95°C for 3s, 60°C for 30s, Read plate) for 40 cycles

Primers:

| Gene   | Sequence                  | Amplicon length |
|--------|---------------------------|-----------------|
| FF_fwd | GTGGTGTGCAGCGAGAATAG      | 59              |
| FF_rev | CGCTCGTTGTAGATGTCGTTAG    |                 |
| RL_fwd | GGAATTATAATGCTTATCTACGTGC | 103             |
| RL_rev | CTTGCGAAAAATGAAGACCTTTTAC |                 |

FF = Firefly, RL = Renilla

Analysis of the qPCR:

Firefly Ct values for each candidate enhancers are then normalized to Renilla Ct values using the delta Ct method described in: Livak, K. J. & Schmittgen, T. D. Analysis of relative gene expression data using real-time quantitative PCR and the 2- $^{-\Delta\Delta Ct}$  method. Methods 25, 402–408 (2001). Delta delta Ct values can then be calculated between candidates (e.g. candidate over negative control or empty vector).
