# Supplementary material
Source: PubMed Central journal article supplement (PMC5793997)
Supplement: NIHMS74958-supplement-Supplementary_Tables_1__3_and_5.pdf [file NIHMS74958-supplement-Supplementary_Tables_1__3_and_5.pdf]

**Supplementary Table 1**

| Reference                    | Year       | Vector   | ORI                   |
|------------------------------|------------|----------|-----------------------|
| This paper                   | -          | pGL4     | pMB1 (pUC derivative) |
| Kwasnieski et al.            | 2012       | pCAGGS   | pMB1                  |
| Melnikov et al.              | 2012       | pGL4     | pMB1 (pUC derivative) |
| Patwardhan et al.            | 2012       | pGL4     | pMB1 (pUC derivative) |
| Kheradpour et al.            | 2013       | pGL4     | pMB1 (pUC derivative) |
| Mogno, Kwasnieski, and Cohen | 2013       | pCAGGS   | pMB1                  |
| Smith et al.                 | 2013       | pGL4     | pMB1 (pUC derivative) |
| White et al.                 | 2016, 2013 | pCAGGS   | pMB1                  |
| Birnbaum et al.              | 2014       | pGL4     | pMB1 (pUC derivative) |
| Vanhille et al.              | 2015       | pGL4     | pMB1 (pUC derivative) |
| Vockley et al.               | 2015, 2016 | pGL4     | pMB1 (pUC derivative) |
| Ferreira et al.              | 2016       | pGL4     | pMB1 (pUC derivative) |
| Nguyen et al.                | 2016       | pAAV-CAG | pMB1 (pUC derivative) |
| Tewhey et al.                | 2016       | pGL4     | pMB1 (pUC derivative) |
| Ulirsch et al.               | 2016       | pGL4     | pMB1 (pUC derivative) |
| Barakat et al.               | 2017       | pGL4     | pMB1 (pUC derivative) |
| Dao et al.                   | 2017       | pGL4     | pMB1 (pUC derivative) |
| Grossman et al.              | 2017       | pGL4     | pMB1 (pUC derivative) |
| van Arensbergen et al.       | 2017       | pSMART   | pMB1 (pUC derivative) |

Supplementary Table 3

| cell_line | sequencing_method | sample_name | accession   | database |
|-----------|-------------------|-------------|-------------|----------|
| HeLaS3    | ChIP-seq          | input       | ENCSR000AOB | ENCODE   |
| HeLaS3    | ChIP-seq          | H3K27ac     | ENCSR000AOC | ENCODE   |
| HeLaS23   | ChIP-seq          | H3K36me3    | ENCSR000AOD | ENCODE   |
| HeLaS25   | ChIP-seq          | H3K4me2     | ENCSR000AOE | ENCODE   |
| HeLaS27   | ChIP-seq          | H3K79me2    | ENCSR000AOG | ENCODE   |
| HeLaS28   | ChIP-seq          | H3K9ac      | ENCSR000AOH | ENCODE   |
| HeLaS30   | ChIP-seq          | H4K20me1    | ENCSR000AOI | ENCODE   |
| HeLaS22   | ChIP-seq          | H3K27me3    | ENCSR000APB | ENCODE   |
| HeLaS24   | ChIP-seq          | H3K4me1     | ENCSR000APW | ENCODE   |
| HeLaS20   | ChIP-seq          | H2AFZ       | ENCSR000AQN | ENCODE   |
| HeLaS29   | ChIP-seq          | H3K9me3     | ENCSR000AQO | ENCODE   |
| HeLaS50   | ChIP-seq          | POLR2A      | ENCSR000BGO | ENCODE   |
| HeLaS66   | ChIP-seq          | TAF1        | ENCSR000BHT | ENCODE   |
| HeLaS43   | ChIP-seq          | MYC         | ENCSR000DLN | ENCODE   |
| HeLaS47   | ChIP-seq          | NFYB        | ENCSR000DNR | ENCODE   |
| HeLaS46   | ChIP-seq          | NFYA        | ENCSR000DNS | ENCODE   |
| HeLaS76   | ChIP-seq          | ZZZ3        | ENCSR000DNT | ENCODE   |
| HeLaS52   | ChIP-seq          | POLR3A      | ENCSR000DNU | ENCODE   |
| HeLaS6    | ChIP-seq          | BRF2        | ENCSR000DNV | ENCODE   |
| HeLaS5    | ChIP-seq          | BRF1        | ENCSR000DNW | ENCODE   |
| HeLaS3    | ChIP-seq          | BDP1        | ENCSR000DNX | ENCODE   |
| HeLaS19   | ChIP-seq          | GTF3C2      | ENCSR000DNY | ENCODE   |
| HeLaS32   | ChIP-seq          | HCFC1       | ENCSR000ECH | ENCODE   |
| HeLaS14   | ChIP-seq          | ELK1        | ENCSR000ECI | ENCODE   |
| HeLaS73   | ChIP-seq          | ZKSCAN1     | ENCSR000ECJ | ENCODE   |
| HeLaS38   | ChIP-seq          | MAFK        | ENCSR000ECK | ENCODE   |
| HeLaS41   | ChIP-seq          | MAZ         | ENCSR000ECL | ENCODE   |
| HeLaS55   | ChIP-seq          | RCOR1       | ENCSR000ECM | ENCODE   |
| HeLaS39   | ChIP-seq          | MAX         | ENCSR000ECN | ENCODE   |
| HeLaS74   | ChIP-seq          | ZNF143      | ENCSR000ECO | ENCODE   |
| HeLaS9    | ChIP-seq          | CHD2        | ENCSR000ECP | ENCODE   |
| HeLaS65   | ChIP-seq          | SUPT20H     | ENCSR000ECQ | ENCODE   |
| HeLaS36   | ChIP-seq          | KAT2A       | ENCSR000ECR | ENCODE   |
| HeLaS61   | ChIP-seq          | SMC3        | ENCSR000ECS | ENCODE   |
| HeLaS51   | ChIP-seq          | POLR2Aphosp | ENCSR000ECT | ENCODE   |
| HeLaS42   | ChIP-seq          | MXI1        | ENCSR000ECU | ENCODE   |
| HeLaS16   | ChIP-seq          | EP300       | ENCSR000ECV | ENCODE   |
| HeLaS71   | ChIP-seq          | USF2        | ENCSR000ECW | ENCODE   |
| HeLaS56   | ChIP-seq          | RFX5        | ENCSR000ECX | ENCODE   |
| HeLaS53   | ChIP-seq          | PRDM1       | ENCSR000ECY | ENCODE   |
| HeLaS18   | ChIP-seq          | GTF2F1      | ENCSR000ECZ | ENCODE   |
| HeLaS7    | ChIP-seq          | CEBPB       | ENCSR000EDA | ENCODE   |
| HeLaS4    | ChIP-seq          | BRC A1      | ENCSR000EDB | ENCODE   |
| HeLaS64   | ChIP-seq          | STAT3       | ENCSR000EDC | ENCODE   |
| HeLaS67   | ChIP-seq          | TBP         | ENCSR000EDD | ENCODE   |
| HeLaS54   | ChIP-seq          | RAD21       | ENCSR000EDE | ENCODE   |
| HeLaS33   | ChIP-seq          | IRF3        | ENCSR000EDF | ENCODE   |
| HeLaS35   | ChIP-seq          | JUN         | ENCSR000EDG | ENCODE   |
| HeLaS34   | ChIP-seq          | JUND        | ENCSR000EDH | ENCODE   |
| HeLaS49   | ChIP-seq          | NRF1        | ENCSR000EDJ | ENCODE   |
| HeLaS58   | ChIP-seq          | SMARCB1     | ENCSR000EDK | ENCODE   |

|              |           |         |                                           |        |
|--------------|-----------|---------|-------------------------------------------|--------|
| HeLaS60      | ChIP-seq  | SMARCC2 | ENCSR000EDL                               | ENCODE |
| HeLaS59      | ChIP-seq  | SMARCC1 | ENCSR000EDM                               | ENCODE |
| HeLaS68      | ChIP-seq  | TCF7L2  | ENCSR000EVE                               | ENCODE |
| HeLaS69      | ChIP-seq  | TCF7L2  | ENCSR000EVF                               | ENCODE |
| HeLaS75      | ChIP-seq  | ZNF274  | ENCSR000EVG                               | ENCODE |
| HeLaS15      | ChIP-seq  | ELK4    | ENCSR000EVI                               | ENCODE |
| HeLaS11      | ChIP-seq  | E2F1    | ENCSR000EVJ                               | ENCODE |
| HeLaS13      | ChIP-seq  | E2F6    | ENCSR000EVK                               | ENCODE |
| HeLaS12      | ChIP-seq  | E2F4    | ENCSR000EVL                               | ENCODE |
| HeLaS31      | ChIP-seq  | HA-E2F1 | ENCSR000EVM                               | ENCODE |
| HeLaS48      | ChIP-seq  | NR2C2   | ENCSR000EVN                               | ENCODE |
| HeLaS57      | ChIP-seq  | SMARCA4 | ENCSR000EVC                               | ENCODE |
| HeLaS44      | ChIP-seq  | MYC     | ENCSR000EZD                               | ENCODE |
| HeLaS17      | ChIP-seq  | FOS     | ENCSR000EZE                               | ENCODE |
| HeLaS40      | ChIP-seq  | MAX     | ENCSR000EZF                               | ENCODE |
| HeLaS63      | ChIP-seq  | STAT1   | ENCSR000EZK                               | ENCODE |
| HeLaS37      | ChIP-seq  | MAFF    | ENCSR140DSL                               | ENCODE |
| HeLaS10      | ChIP-seq  | DEK     | ENCSR219MKK                               | ENCODE |
| HeLaS26      | ChIP-seq  | H3K4me3 | ENCSR340WQU                               | ENCODE |
| HeLaS8       | ChIP-seq  | CHD1    | ENCSR392EAA                               | ENCODE |
| HeLaS62      | ChIP-seq  | SREBF2  | ENCSR611WZO                               | ENCODE |
| HeLaS70      | ChIP-seq  | UBTF    | ENCSR634ZGP                               | ENCODE |
| HeLaS45      | ChIP-seq  | NFE2L2  | ENCSR707IUN                               | ENCODE |
| HeLaS72      | ChIP-seq  | ZHX1    | ENCSR887MXT                               | ENCODE |
| HeLaS3       | ChIP-seq  | DHS     | ENCSR959ZXU                               | ENCODE |
| HCT116       | DNase-seq | DHS     | GSM1224668                                | GEO    |
| HCT116       | ChIP-seq  | H3K72ac | GSM2175555                                | GEO    |
| HCT116       | ChIP-seq  | input   | GSM2175565, GSM2175566, GSM2175567,merged | GEO    |
| HCFaa        | DNase-seq | DHS     | GSM736494,GSM736601                       | GEO    |
| HBMEC        | DNase-seq | DHS     | GSM736509                                 | GEO    |
| HMVEC-dLy-Ad | DNase-seq | DHS     | GSM736599,GSM736591                       | GEO    |
| HNPCEpic     | DNase-seq | DHS     | GSM736621,GSM736550                       | GEO    |
| HBMEC        | ChIP-seq  | input   | GSM749746                                 | GEO    |
| HeLaS3       | ChIP-seq  | GTF3C2  | GSM935342                                 | GEO    |
| HeLaS3       | ChIP-seq  | RPC155  | GSM935489                                 | GEO    |

**Supplementary Table 5**

| Figure | Comparison                             | Test                  | Sided     | P-value  | Degrees of freedom | T-value |
|--------|----------------------------------------|-----------------------|-----------|----------|--------------------|---------|
| 1D     | HeLaS3: ORI vs SCP1                    | paired t-test         | two sided | 3.0E-03  | 38                 | 3.2     |
| 1D     | HCT116: ORI vs SCP1                    | paired t-test         | two sided | 4.0E-03  | 26                 | 3.2     |
| 1E     | AGAP1: ORI vs mCP                      | Fisher's LSD          | two sided | 2.0E-01  | 30                 | 1.3     |
| 1E     | AGAP1: ORI vs SCP1                     | Fisher's LSD          | two sided | 1.1E-03  | 30                 | 3.6     |
| 1E     | GTSE1: ORI vs mCP                      | Fisher's LSD          | two sided | 2.9E-02  | 30                 | 2.3     |
| 1E     | GTSE1: ORI vs SCP1                     | Fisher's LSD          | two sided | 1.3E-06  | 30                 | 6.0     |
| 1E     | IGF1R: ORI vs mCP                      | Fisher's LSD          | two sided | 2.0E-01  | 30                 | 1.3     |
| 1E     | IGF1R: ORI vs SCP1                     | Fisher's LSD          | two sided | 2.8E-01  | 30                 | 1.1     |
| 1E     | SV40: ORI vs mCP                       | Fisher's LSD          | two sided | 9.4E-04  | 30                 | 3.7     |
| 1E     | SV40: ORI vs SCP1                      | Fisher's LSD          | two sided | 7.9E-10  | 30                 | 8.8     |
| 1E     | CMV: ORI vs mCP                        | Fisher's LSD          | two sided | 5.9E-07  | 30                 | 6.3     |
| 1E     | CMV: ORI vs SCP1                       | Fisher's LSD          | two sided | 1.4E-11  | 30                 | 10.5    |
| 2D     | TUBB: -inh vs +inh                     | unpaired t-test       | two sided | 7.2E-01  | 28                 | 0.4     |
| 2D     | IFIT1: -inh vs +inh                    | unpaired t-test       | two sided | 1.4E-09  | 28                 | 8.8     |
| 2D     | ISG15: -inh vs +inh                    | unpaired t-test       | two sided | 1.7E-06  | 28                 | 6.0     |
| 2D     | IFI27: -inh vs +inh                    | unpaired t-test       | two sided | 4.4E-04  | 28                 | 4.0     |
| 2D     | IRF7: -inh vs +inh                     | unpaired t-test       | two sided | 2.1E-03  | 28                 | 3.4     |
| 2D     | MX1: -inh vs +inh                      | unpaired t-test       | two sided | 3.6E-03  | 28                 | 3.2     |
| 2D     | OAS3: -inh vs +inh                     | unpaired t-test       | two sided | 8.1E-03  | 28                 | 2.9     |
| 4D     | 2 vs 1                                 | Wilcoxon rank sum     | greater   | 1.3E-62  | na                 | na      |
| 4D     | 2 vs 3                                 | Wilcoxon rank sum     | greater   | 8.7E-03  | na                 | na      |
| 4D     | 2 vs 4                                 | Wilcoxon rank sum     | greater   | 3.9E-07  | na                 | na      |
| 4E     | 1 vs 2                                 | Wilcoxon rank sum     | greater   | 0.0E+00  | na                 | na      |
| 4E     | 2 vs random                            | Wilcoxon rank sum     | greater   | 6.4E-51  | na                 | na      |
| 4F     | 3 vs 1                                 | Wilcoxon rank sum     | greater   | 9.1E-16  | na                 | na      |
| 4F     | 3 vs 2                                 | Wilcoxon rank sum     | greater   | 1.1E-04  | na                 | na      |
| 4F     | 3 vs random                            | Wilcoxon rank sum     | greater   | 5.0E-26  | na                 | na      |
| 5C     | Active vs inactive with STAT           | Wilcoxon rank sum     | greater   | 6.2E-28  | na                 | na      |
| 5C     | Active vs inactive no STAT             | Wilcoxon rank sum     | greater   | 1.1E-01  | na                 | na      |
| 5C     | Inactive no STAT vs inactive with STAT | Wilcoxon rank sum     | greater   | 7.7E-262 | na                 | na      |
| 5D     | -inh vs +inh                           | Wilcoxon rank sum     | less      | 4.1E-138 | na                 | na      |
| S1F    | SCP1 vs ORI                            | paired t-test         | two sided | 2.0E-02  | 3                  | 4.6     |
| S1H    | SCP1 vs var1                           | Fisher's LSD (paired) | two sided | 9.8E-01  | 152                | 0.0     |
| S1H    | SCP1 vs var2                           | Fisher's LSD (paired) | two sided | 7.8E-01  | 152                | 0.3     |
| S1H    | SCP1 vs var3                           | Fisher's LSD (paired) | two sided | 4.0E-02  | 152                | 2.1     |
| S1H    | SCP1 vs var4                           | Fisher's LSD (paired) | two sided | 5.0E-02  | 152                | 2.0     |
| S3F    | ORI vs ORI+inh                         | paired t-test         | two sided | 4.0E-02  | 38                 | 2.1     |
| S3G    | ORI vs ORI+inh                         | paired t-test         | two sided | 8.9E-01  | 26                 | 0.1     |
